# Supplementary material for: Red blood cell distribution width for the prediction of outcomes after cardiac arrest
Source: PubMed Central journal article supplement (PMC10497505; doi:10.1038/s41598-023-41984-8), 2023-09-12
Supplement: 41598_2023_41984_MOESM1_ESM.pdf [file 41598_2023_41984_MOESM1_ESM.pdf]

## **Supplementary Information**

### **Red blood cell distribution width for the prediction of outcomes after cardiac arrest**

Tabita Urben, MMed<sup>1\*</sup>; Simon A. Amacher, MD<sup>1,2\*</sup>; Christoph Becker, MD<sup>1,3</sup>; Sebastian Gross, MSc<sup>1</sup>; Armon Arpagaus, MD<sup>1</sup>; Kai Tisljar, MD<sup>2</sup>; Raoul Sutter, MD<sup>2,4</sup>; Hans Pargger, MD<sup>2,4</sup>; Stephan Marsch, MD PhD<sup>2,4</sup> and Sabina Hunziker, MD MPH<sup>1,4</sup>

<sup>1</sup> Medical Communication and Psychosomatic Medicine, University Hospital Basel, Basel, Switzerland.

<sup>2</sup> Intensive Care Unit, University Hospital Basel, Basel, Switzerland.

<sup>3</sup> Department of Emergency Medicine, University Hospital Basel, Basel, Switzerland.

<sup>4</sup> Medical Faculty, University of Basel, Basel, Switzerland.

\* These authors contributed equally to this work and should be considered equal first authors

| <b>Table S1 – Sensitivity and Specificity (cut-offs by Cheng et al*)</b>                                                                                                                                                                                                                                                 |               |                                                                      |                                                                   |
|--------------------------------------------------------------------------------------------------------------------------------------------------------------------------------------------------------------------------------------------------------------------------------------------------------------------------|---------------|----------------------------------------------------------------------|-------------------------------------------------------------------|
|                                                                                                                                                                                                                                                                                                                          |               | <b>Poor neurological outcome: CPC 3-5<br/>RDW Max** cut-off 14.6</b> | <b>Mortality at hospital discharge<br/>RDW Max** cut-off 15.5</b> |
| Prevalence                                                                                                                                                                                                                                                                                                               | Pr(A)         | 54.00%                                                               | 43.00%                                                            |
| Sensitivity                                                                                                                                                                                                                                                                                                              | Pr(+A)        | 52.00%                                                               | 30.80%                                                            |
| Specificity                                                                                                                                                                                                                                                                                                              | Pr(-N)        | 70.00%                                                               | 79.20%                                                            |
| Likelihood ratio (+)                                                                                                                                                                                                                                                                                                     | Pr(+A)/Pr(+N) | 1.73                                                                 | 1.48                                                              |
| Likelihood ratio (-)                                                                                                                                                                                                                                                                                                     | Pr(-A)/Pr(-N) | 0.69                                                                 | 0.87                                                              |
| Odds ratio                                                                                                                                                                                                                                                                                                               | LR(+)/LR(-)   | 2.52                                                                 | 1.7                                                               |
| Positive predictive value                                                                                                                                                                                                                                                                                                | Pr(A+)        | 67.00%                                                               | 52.80%                                                            |
| Negative predictive value                                                                                                                                                                                                                                                                                                | Pr(N-)        | 55.40%                                                               | 60.30%                                                            |
| *Cheng, Y. <i>et al.</i> Associations between red cell distribution width and outcomes of adults with in-hospital cardiac arrest: A retrospective study. <i>Medicine (Baltimore)</i> <b>101</b> , e28750 (2022). <a href="https://doi.org/10.1097/md.00000000000028750">https://doi.org/10.1097/md.00000000000028750</a> |               |                                                                      |                                                                   |
| **RDW Max picks the mean of the maximum RDW value from the cohort                                                                                                                                                                                                                                                        |               |                                                                      |                                                                   |
| <b>CPC</b> Cerebral performance category scale; <b>RDW</b> Red cell distribution width                                                                                                                                                                                                                                   |               |                                                                      |                                                                   |
